# Supplementary material for: Prevalence and virulence genes of Staphylococcus aureus from food contact surfaces in Thai restaurants
Source: PeerJ. 2023 Aug 14;11:e15824. doi: 10.7717/peerj.15824 (PMC10434075; doi:10.7717/peerj.15824)
Supplement: Supplemental Information 1 — The sources of S. aureus contamination [file peerj-11-15824-s001.xlsx]

## Sheet: Sheet2
No.	Isolate No.	Source	Biofilm formation on Congored agar		PCR
			Positive	Negative	ica gene	fnbA gene	cna gene	bap gene	sec gene	sed gene
1	1	Hand		√		√	√
2	2	Hand		√
3	3	Hand	√				√
4	4	Hand	√				√
5	5	Hand		√
6	6	Hand		√
7	7	Hand		√
8	8	Hand		√
9	9	Hand	√			√
10	10	Hand	√		√	√	√
11	11	Hand	√		√	√
12	12	Hand	√		√	√
13	13	Hand	√
14	14	Hand		√						√
15	15	Hand		√			√
16	16	plate		√		√
17	17	spoon	√
18	18	Hand	√
19	19	Hand	√
20	20	plate	√
21	21	glass	√
22	22	Hand	√
23	23	Hand		√
24	24	Hand		√			√
25	25	plate	√
26	26	Hand	√
27	28	Hand		√
28	29	spoon		√
29	30	Hand		√
30	31	Hand		√
31	32	spoon		√
32	33	Hand		√
33	34	spoon		√
34	35	plate		√
35	36	Hand		√
36	37	Hand		√
37	38	Hand		√
38	39	Hand		√
39	40	Hand		√
40	41	Hand		√
41	42	Hand		√
42	43	Hand		√
43	44	spoon		√
44	45	glass		√
45	46	glass		√
46	47	Hand	√
47	48	plate	√
48	49	spoon	√		√	√
49	50	spoon		√
50	51	Hand		√
51	53	Hand	√		√	√
52	54	Hand	√		√	√	√
53	55	spoon	√		√	√
54	56	Hand	√		√	√	√
55	57	Hand	√		√	√
56	58	Hand	√		√	√
57	59	Hand		√
58	60	Hand		√
59	62	chopping board	√			√			√
60	63	spoon		√
61	64	spoon		√
62	65	chopping board		√
63	66	knive		√					√
64	67	chopping board		√
65	68	knive		√
66	69	plate		√
67	70	spoon		√
68	71	knive		√
69	72	Hand		√
70	73	chopping board		√
71	74	chopping board		√					√
72	75	plate		√
73	77	Hand		√
74	79	Hand		√
75	80	chopping board		√
76	81	plate		√
77	82	chopping board		√					√
78	83	Hand		√		√
79	84	plate		√		√
80	85	Hand		√
81	86	chopping board		√		√
82	87	glass		√
83	88	plate		√		√
84	89	Hand		√
85	90	chopping board		√						√
86	91	Hand		√
87	92	Hand		√
88	93	Hand		√
89	94	Hand		√
90	95	Hand		√
91	96	knive		√						√
92	97	chopping board		√
93	98	chopping board		√
94	99	Hand		√						√
95	100	knive		√
96	101	knive		√
97	102	glass		√
98	103	Hand		√
99	104	chopping board		√						√
100	105	spoon		√
101	106	chopping board		√
102	107	Hand		√
103	108	Hand		√
104	109	Hand		√
105	110	Hand		√
106	111	knive		√
107	112	Hand		√
108	113	Hand		√
109	114	Hand		√
110	116	Hand		√
111	117	chopping board		√
112	119	Hand		√
113	121	Hand		√
114	124	plate		√
115	128	Hand		√
116	129	plate		√
117	130	Hand		√
118	132	Hand	√				√
119	133	plate	√		√
120	143	plate		√
121	153	Hand		√
122	155	plate		√
123	157	plate		√
124	163	Hand		√
125	166	Hand		√
126	167	Hand		√
127	168	Hand		√
128	169	Hand		√
129	170	Hand		√
130	171	Hand		√
131	174	Hand		√
132	177	plate		√
133	178	Hand		√
134	179	chopping board		√
135	180	Hand		√
136	181	Hand		√
137	182	Hand		√
138	183	Hand		√
139	184	plate		√
140	185	plate		√
141	186	plate		√				√
142	187	plate		√
143	188	chopping board		√
144	189	plate		√		√	√
145	190	plate		√
146	191	Hand	√		√
147	192	Hand		√
148	194	Hand		√
149	195	Hand		√
150	197	Hand		√
151	198	Hand	√		√
152	200	Hand	√		√	√
153	201	Hand		√
154	202	Hand	√		√
155	203	Hand	√		√
156	204	Hand	√
157	205	Hand	√		√
158	206	Hand		√
159	207	Hand		√		√
160	208	Hand	√
161	209	Hand		√
162	210	Hand	√		√
163	211	Hand		√
164	212	Hand	√		√		√
165	213	Hand		√		√
166	214	Hand		√
167	215	Hand	√		√
168	216	Hand	√		√
169	217	Hand	√		√
170	219	Hand	√
171	224	Hand		√
172	227	Hand	√
173	229	Hand		√
174	230	Hand	√
175	232	knive	√		√	√
176	233	knive	√		√
177	235	knive		√
178	236	knive		√		√
179	237	knive	√				√
180	238	knive		√
181	240	knive		√
182	241	knive		√
183	242	knive		√
184	244	chopping board		√
185	245	chopping board		√
186	246	chopping board		√
187	248	chopping board		√
188	249	chopping board		√
189	252	chopping board	√		√					√
190	253	chopping board		√
191	254	chopping board		√
192	257	Hand		√
193	258	Hand	√
194	259	Hand		√
195	261	Hand		√
196	262	Hand	√		√	√
197	263	spoon		√		√
198	264	Hand		√		√
199	266	chopping board		√		√
200	267	chopping board		√		√	√
